# Supplementary material
Source: MDPI journal article supplement (https://www.mdpi.com/1996-1073/13/23/6467)
Supplement: s1 [file s1]

# Impact of Chemistry–Turbulence Interaction Modeling Approach on the CFD Simulations of Entrained Flow Coal Gasification

Jakub Mularski \* and Norbert Modliński

Department of Mechanics, Machines, Devices and Energy Processes, Wrocław University of Science and Technology, Wybrzeże Wyspiańskiego 27, 50-370 Wrocław, Poland; norbert.modlinski@pwr.edu.pl

\* Correspondence: jakub.mularski@pwr.edu.pl; Tel.: +48-71-320-21-81

Received: 12 November 2020; Accepted: 4 December 2020; Published: 7 December 2020

## Section 2.1 Devolatilization

| Model                                  | Short description                                                                                                                                                                                                                                                                                                                                                                                                                                                             |
|----------------------------------------|-------------------------------------------------------------------------------------------------------------------------------------------------------------------------------------------------------------------------------------------------------------------------------------------------------------------------------------------------------------------------------------------------------------------------------------------------------------------------------|
| <b>Global models</b>                   |                                                                                                                                                                                                                                                                                                                                                                                                                                                                               |
| Single-step first-order (SFOR) [1–3]   | <p>Volatiles <math>V</math> that evolve during the devolatilization process are related to the difference between the current <math>V</math> and the ultimate yield of <math>V_{\infty}</math>.</p> $\frac{dV}{dt} = A \cdot \exp\left(-\frac{E}{RT}\right) \cdot (V_{\infty} - V)$ <p>Mechanism is based on two competing reactions producing char and volatiles from coal. One of the reactions predominates at lower heating rates, whereas the other at higher rates.</p> |
| Competing two-step (C2SM) [4]          | $\text{coal} \xrightarrow{k_1} (1 - \alpha_1)\text{char} + \alpha_1\text{volatiles}$ $\text{coal} \xrightarrow{k_2} (1 - \alpha_2)\text{char} + \alpha_2\text{volatiles}$ $\frac{dV}{dt} = \left(\alpha_1 A_1 \exp\left(-\frac{E_1}{RT_1}\right) + \alpha_2 A_2 \exp\left(-\frac{E_2}{RT_2}\right)\right) \cdot C$                                                                                                                                                            |
| <b>Phenomenological network models</b> |                                                                                                                                                                                                                                                                                                                                                                                                                                                                               |
| FG-DVC [5]                             | Coal is represented by functional groups. The decomposition occurs through first order reactions to the products of tar, char and gas.                                                                                                                                                                                                                                                                                                                                        |
| CPD [6–8]                              | The chemical percolation devolatilization model is based on the characteristics of a coal obtained through a 13-C NMR spectroscopy                                                                                                                                                                                                                                                                                                                                            |

### Parameters for CPD Model: - BYU Reactor

- Side molecular chain weight – 45
- Cluster molecular weight – 557
- Initial fraction of bridges in coal lattice – 0.33
- Lattice coordination number – 4.9
- Initial fraction of char bridges - 0
- Volatiles –  $0.272C_xH_yO_z + 0.2645C_mH_n + 0.2287H_2O + 0.2076CO + 0.0762CO_2$

### Parameters for SFOR Model – MHI Reactor

$$A = 113700, E = 6.094 \times 10^7$$

$$\text{Volatiles} - 0.1766C_xH_yO_z + 0.4729C_mH_n + 0.1999H_2O + 0.125CO + 0.0256CO_2$$

### Parameters for C2SM Model – E-gas Reactor

$$\alpha_1 = 0.35, \alpha_2 = 1, A_1 = 79690, E_1 = 5 \times 10^7, A_2 = 9305000, E_2 = 1.168 \times 10^8$$

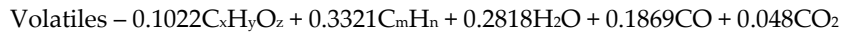

#### Section 4 Ideal Plug Flow Reactor Study

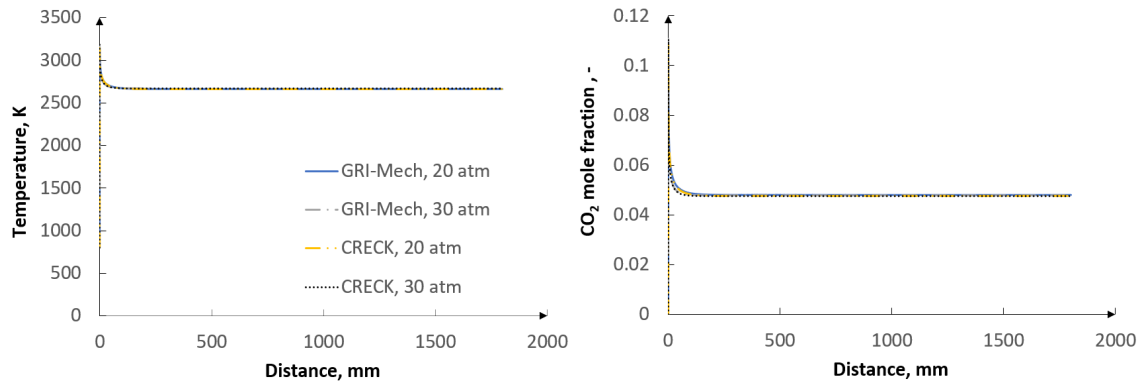

**Figure S1.** Distributions in PFR for GRI-Mech and CRECK: a) temperature distribution, b) CO<sub>2</sub> mole fraction

#### Section 6 Mesh Independence Study

Performed for the global approach and the eddy dissipation concept. The results of CO and H<sub>2</sub> mole fraction distribution with respect to the mesh size are presented.

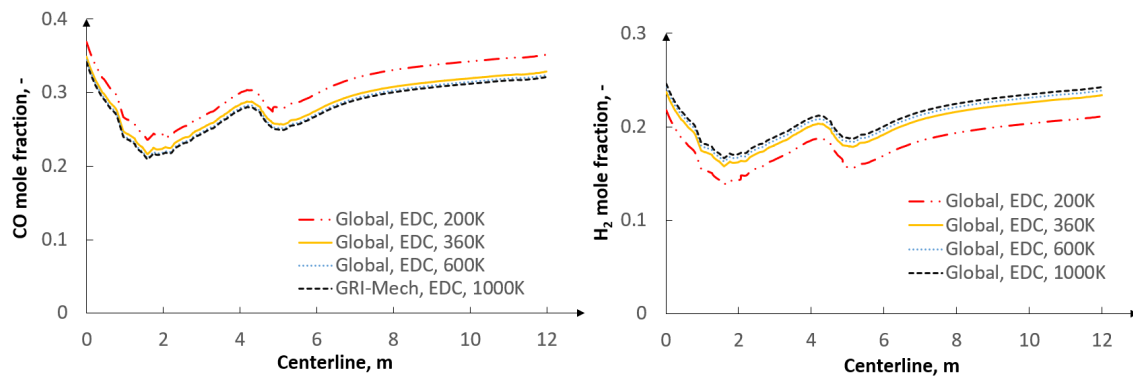

**Figure S2.** Mesh independence study for E-gas reactor – a) CO mole fraction and b) H<sub>2</sub> mole fraction distributions.

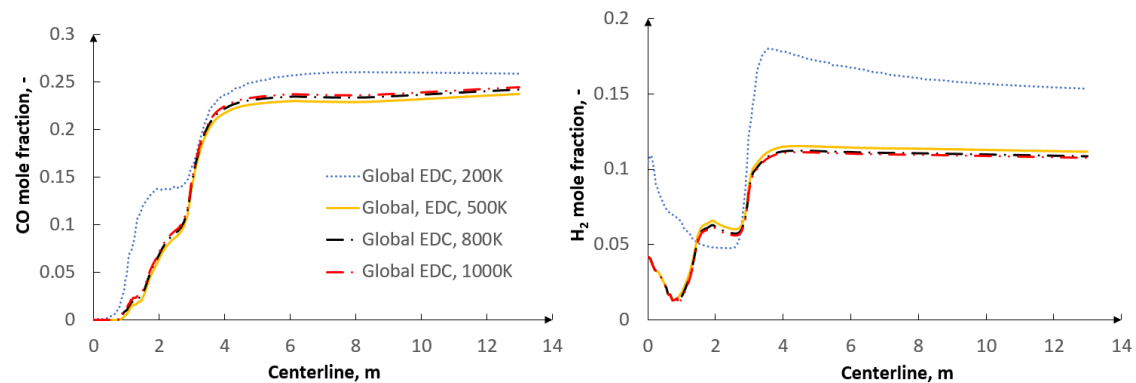

**Figure S3.** Mesh independence study for MHI reactor – a) CO mole fraction and H<sub>2</sub> mole fraction distribution.

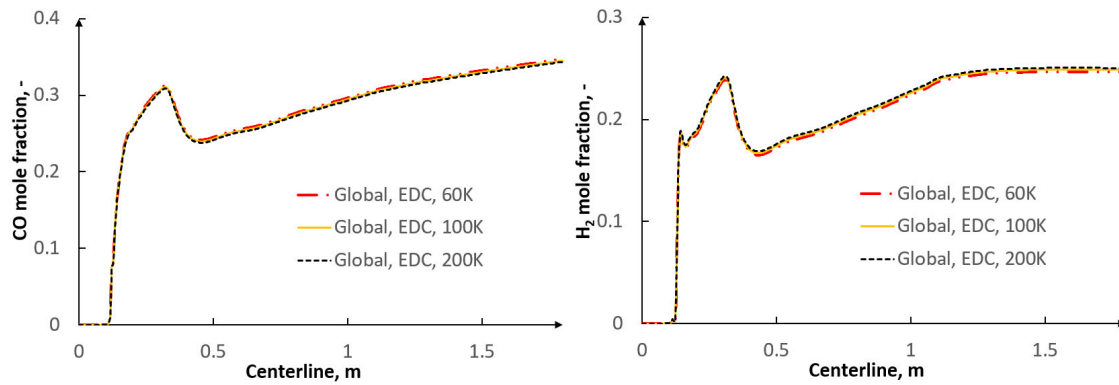

**Figure S4.** Mesh independence study for BYU reactor – a) CO mole fraction and H<sub>2</sub> mole fraction distribution.

## Reference

1. Badzioch, S.; Hawksley, P. Kinetics of thermal decomposition of pulverized coal particles. *Ind. Eng. Chem. Process Des. Dev.* **1970**, *9*, 521–530.
2. Anthony, D.B.; Howard, J.B.; Hottel, H.C.; Meissner, H.P. Rapid devolatilization of pulverized coal. *Symp. Combust.* **1975**, *15*, 1303–1317.
3. Solomon, P.R.; Colket, M.B. Coal devolatilization. *Symp. Combust.* **1979**, *17*, 131–143.
4. Kobayashi, H.; Howard, J.B.; Sarofim, A.F. Coal devolatilization at high temperatures. *Symp. Combust.* **1977**, *16*, 411–425.
5. Solomon, P.R.; Hamblen, D.G.; Carangelo, R.M.; Serio, M.A.; Deshpande, G.V. General model of coal devolatilization. *ACS Div. Fuel Chem. Prepr.* **1987**, *32*, 83–98.
6. Grant, D.M.; Pugmire, R.J.; Fletcher, T.H.; Kerstein, A.R. Chemical model of coal devolatilization using percolation lattice statistics. *Energy Fuels* **1989**, *3*, 175–186.
7. Fletcher, T.H.; Kerstein, A.R.; Pugmire, R.J.; Grant, D.M. Chemical percolation model for devolatilization. 2. Temperature and heating rate effects on product yields. *Energy Fuels* **1990**, *4*, 54–60.
8. Scott, S.A.; Dennis, J.S.; Davidson, J.F.; Hayhurst, A.N. An algorithm for determining the kinetics of devolatilisation of complex solid fuels from thermogravimetric experiments. *Chem. Eng. Sci.* **2006**, *61*, 2339–2348.
